# Supplementary material for: Z. morio Hemolymph Relieves E. coli-Induced Mastitis by Inhibiting Inflammatory Response and Repairing the Blood–Milk Barrier
Source: MDPI journal article supplement (doi:10.3390/ijms232113279), 2022-10-31
Supplement: s1 [file s1]

## Supplementary Materials

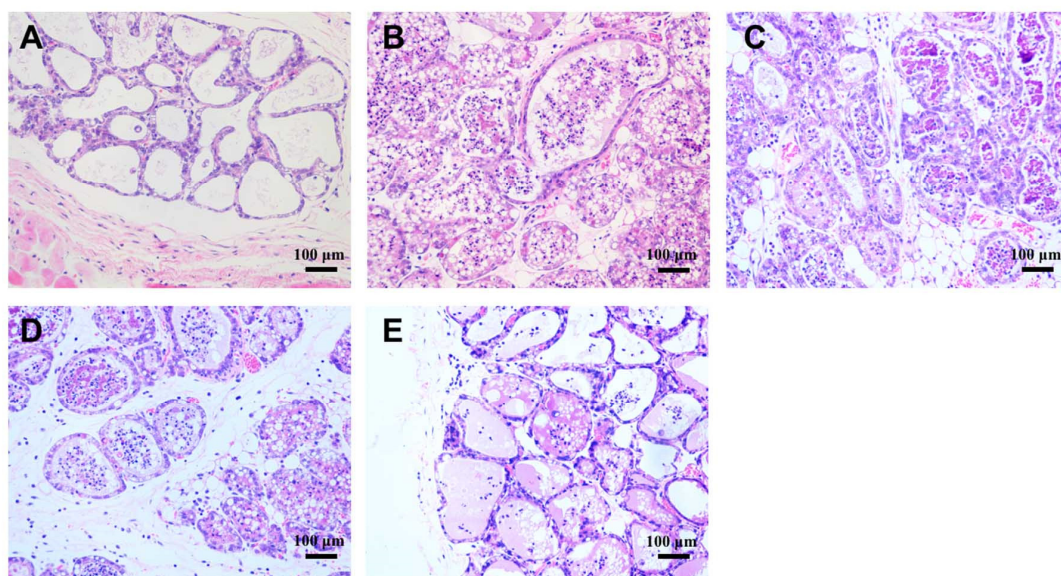

**Figure S1.** *Z. morio* hemolymph reduces pathological injury of mammary gland in *E. coli*-induced mastitis (original magnification 100 ×). (A) control group, (B) *E. coli* group, (C) *E. coli* + *Z. morio* hemolymph (15 mg/ml, 25 µL) group, (D) *E. coli* + *Z. morio* hemolymph (25 mg/ml, 25 µL) group, and (E) *E. coli* + *Z. morio* hemolymph (35 mg/ml, 25 µL) group.

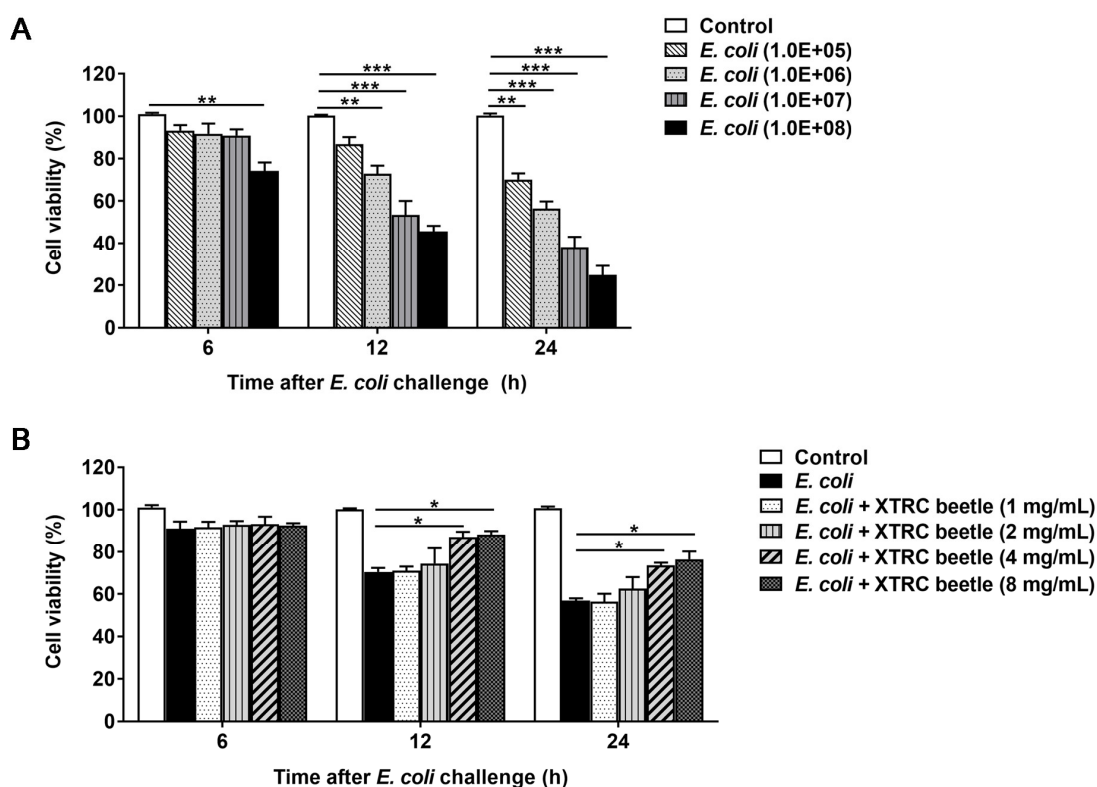

**Figure S2.** Determination of concentration of *E. coli* and *Z. morio* hemolymph in vitro. (A) PMECs were treated with different conditions of *E. coli* ( $1 \times 10^5$ ,  $1 \times 10^6$ ,  $1 \times 10^7$ ,  $1 \times 10^8$  CFU) for 6, 12, and 24 h, and cell viability was evaluated by CCK8 to determine the concentration of *E. coli*. (B) Cells were incubated with *E. coli* ( $1 \times 10^6$  CFU) and *Z. morio* hemolymph at 1, 2, 4, 8 mg/mL for 6, 12, and 24 h, respectively. And cell viability was evaluated by CCK8 to determine the working concentration of *Z. morio* hemolymph. \*  $p < 0.05$ , \*\*  $p < 0.01$ , \*\*\*  $p < 0.001$ .
